# Supplementary material for: Accurate and fast graph-based pangenome annotation and clustering with ggCaller
Source: HighWire-hosted journal article supplement (doi:10.1101/gr.277733.123), 2023-08-24
Supplement: Supplemental_Code.zip [file comp_benchmarking_comparison.xlsx]

## Sheet: graph_complexity_pneumo
Tool	Tool_short	Dataset	Num_Isolates	Num_threads	Nodes	Edges	V+E	Runtime	Memory_kb	Runtime_mins	Memory_GB
ggCaller	GGC - ST	SP - Global	5	16	73050	197146	270196	0.00194942	4022708	2.80717	4.02271
ggCaller	GGC - ST	SP - Global	10	16	124835	337578	462413	0.0024581	4189472	3.53967	4.18947
ggCaller	GGC - ST	SP - Global	50	16	311063	847165	1158228	0.008889	4846364	12.8002	4.84636
ggCaller	GGC - ST	SP - Global	100	16	457402	1251014	1708416	0.0249823	5356252	35.9745	5.35625
ggCaller	GGC - ST	SP - Global	500	16	1063890	2952143	4016033	0.503819	34008848	725.5	34.0088
ggCaller	GGC - ST	SP - Global	1000	16	1498445	4194786	5693231	1.95159	80833708	2810.28	80.8337
ggCaller	GGC - ST	SP - Global	2000	16	2115677	5988343	8104020	9.36057	206833868	13479.2	206.834
ggCaller	GGC - ST	SP - Massachusetts	5	16	65627	176937	242564	0.00161863	3984752	2.33083	3.98475
ggCaller	GGC - ST	SP - Massachusetts	10	16	132402	357955	490357	0.00225081	4184896	3.24117	4.1849
ggCaller	GGC - ST	SP - Massachusetts	50	16	226869	616086	842955	0.00588472	4547692	8.474	4.54769
ggCaller	GGC - ST	SP - Massachusetts	100	16	294831	802292	1097123	0.0129885	4801640	18.7035	4.80164
ggCaller	GGC - ST	SP - Massachusetts	500	16	460813	1261135	1721948	0.0840046	21512548	120.967	21.5125
ggCaller	GGC - ST	NG - Global	5	16	33422	90449	123871	0.00130799	827168	1.8835	0.827168
ggCaller	GGC - ST	NG - Global	10	16	43183	116905	160088	0.0015735	1164780	2.26583	1.16478
ggCaller	GGC - ST	NG - Global	50	16	92091	248985	341076	0.00406875	2524820	5.859	2.52482
ggCaller	GGC - ST	NG - Global	100	16	115720	313116	428836	0.00673993	3754608	9.7055	3.75461
ggCaller	GGC - ST	NG - Global	500	16	208305	565978	774283	0.0448611	18077828	64.6	18.0778
ggCaller	GGC - ST	NG - Global	1000	16	293045	796263	1089308	0.143137	38969980	206.117	38.97
ggCaller	GGC - ST	NG - Global	3000	16	571608	1558728	2130336	0.889444	152298472	1280.8	152.298

## Sheet: benchmark_pneumo
Tool	Tool_short	Dataset	Num_Isolates	Num_threads	Runtime	Memory_kb	Runtime_mins	Memory_GB
Prokka	PROKKA	SP - Global	5	16	00:52:00.220000	438128	52.0037	0.438128
Prokka	PROKKA	SP - Global	10	16	01:44:58.490000	435468	104.975	0.435468
Prokka	PROKKA	SP - Global	50	16	09:01:36.194000	441324	541.603	0.441324
Prokka	PROKKA	SP - Global	100	16	17:44:03.474000	435948	1064.06	0.435948
Prokka	PROKKA	SP - Global	500	16	1900-01-03 10:31:52	433721	4951.87	0.433721
Prokka	PROKKA	SP - Global	1000	16	1900-01-06 19:32:40	439188	9812.67	0.439188
Prokka	PROKKA	SP - Global	2000	16	1900-01-13 22:26:53	438384	20066.9	0.438384
Panaroo	PAN - ST	Global	5	16	00:00:36.070000	316368	0.601167	0.316368
Panaroo	PAN - ST	Global	10	16	00:00:55.090000	322964	0.918167	0.322964
Panaroo	PAN - ST	Global	50	16	00:02:59.720000	377824	2.99533	0.377824
Panaroo	PAN - ST	Global	100	16	00:05:40.400000	537900	5.67333	0.5379
Panaroo	PAN - ST	Global	500	16	00:47:57.310000	2231208	47.9552	2.23121
Panaroo	PAN - ST	Global	1000	16	02:07:21	4924544	127.35	4.92454
Panaroo	PAN - ST	Global	2000	16	06:36:09	12306592	396.15	12.3066
ggCaller	GGC - ST	Global	5	16	00:02:48.430000	4022708	2.80717	4.02271
ggCaller	GGC - ST	Global	10	16	00:03:32.380000	4189472	3.53967	4.18947
ggCaller	GGC - ST	Global	50	16	00:12:48.010000	4846364	12.8002	4.84636
ggCaller	GGC - ST	Global	100	16	00:35:58.470000	5356252	35.9745	5.35625
ggCaller	GGC - ST	Global	500	16	12:05:30	34008848	725.5	34.0088
ggCaller	GGC - ST	Global	1000	16	1900-01-01 22:50:17	80833708	2810.28	80.8337
ggCaller	GGC - ST	Global	2000	16	1900-01-09 08:39:13	206833868	13479.2	206.834
PEPPAN	PEP	Global	5	16	00:00:43.850000	352992	0.730833	0.352992
PEPPAN	PEP	Global	10	16	00:00:58.740000	406108	0.979	0.406108
PEPPAN	PEP	Global	50	16	00:03:36.680000	803672	3.61133	0.803672
PEPPAN	PEP	Global	100	16	00:06:58.910000	1289504	6.98183	1.2895
PEPPAN	PEP	Global	500	16	01:01:00	5489620	61	5.48962
PEPPAN	PEP	Global	1000	16	03:55:03	12177728	235.05	12.1777
PEPPAN	PEP	Global	2000	16	NA	NA	NA	NA
Roary	ROA	Global	5	16	00:00:26.490000	430188	0.4415	0.430188
Roary	ROA	Global	10	16	00:00:43.770000	454204	0.7295	0.454204
Roary	ROA	Global	50	16	00:02:45.060000	564192	2.751	0.564192
Roary	ROA	Global	100	16	00:06:16.800000	856968	6.28	0.856968
Roary	ROA	Global	500	16	00:44:48.120000	3963692	44.802	3.96369
Roary	ROA	Global	1000	16	01:49:45	8048176	109.75	8.04818
Roary	ROA	Global	2000	16	04:11:34	16604904	251.567	16.6049
ggCaller	GGC - ST	Massachusetts	5	16	00:02:19.850000	3984752	2.33083	3.98475
ggCaller	GGC - ST	Massachusetts	10	16	00:03:14.470000	4184896	3.24117	4.1849
ggCaller	GGC - ST	Massachusetts	50	16	00:08:28.440000	4547692	8.474	4.54769
ggCaller	GGC - ST	Massachusetts	100	16	00:18:42.210000	4801640	18.7035	4.80164
ggCaller	GGC - ST	Massachusetts	500	16	02:00:58	21512548	120.967	21.5125
Prokka	PROKKA	Massachusetts	1	16	00:09:15.290000	433528	9.25483	0.433528
Prokka	PROKKA	Massachusetts	5	16	00:50:05	433678	50.0833	0.433678
Prokka	PROKKA	Massachusetts	10	16	01:37:40	433321	97.6667	0.433321
Prokka	PROKKA	Massachusetts	50	16	07:30:50	442732	450.833	0.442732
Prokka	PROKKA	Massachusetts	100	16	14:23:20	435390	863.333	0.43539
Prokka	PROKKA	Massachusetts	500	16	1900-01-03 05:07:25	434421	4627.42	0.434421
Roary	ROA	Massachusetts	5	16	00:00:26.050000	428700	0.434167	0.4287
Roary	ROA	Massachusetts	10	16	00:00:47.420000	453868	0.790333	0.453868
Roary	ROA	Massachusetts	50	16	00:02:13.670000	534004	2.22783	0.534004
Roary	ROA	Massachusetts	100	16	00:04:33.730000	790776	4.56217	0.790776
Roary	ROA	Massachusetts	500	16	00:23:59.840000	3565104	23.9973	3.5651
Panaroo	PAN - ST	Massachusetts	5	16	00:00:38.240000	314824	0.637333	0.314824
Panaroo	PAN - ST	Massachusetts	10	16	00:01:02.530000	322004	1.04217	0.322004
Panaroo	PAN - ST	Massachusetts	50	16	00:02:11.690000	365344	2.19483	0.365344
Panaroo	PAN - ST	Massachusetts	100	16	00:03:45.070000	470660	3.75117	0.47066
Panaroo	PAN - ST	Massachusetts	500	16	00:12:56.680000	1528472	12.9447	1.52847
PEPPAN	PEP	Massachusetts	5	16	00:00:49.490000	346224	0.824833	0.346224
PEPPAN	PEP	Massachusetts	10	16	00:01:16.580000	406928	1.27633	0.406928
PEPPAN	PEP	Massachusetts	50	16	00:04:18.280000	783496	4.30467	0.783496
PEPPAN	PEP	Massachusetts	100	16	00:08:29.620000	1299204	8.49367	1.2992
PEPPAN	PEP	Massachusetts	500	16	01:13:30	5705488	73.5	5.70549
Prokka	PROKKA	NG - Global	5	16	00:05:39.330000	157824	5.6555	0.157824
Prokka	PROKKA	NG - Global	10	16	00:02:46.510000	157824	2.77517	0.157824
Prokka	PROKKA	NG - Global	50	16	00:23:42.250000	242676	23.7042	0.242676
Prokka	PROKKA	NG - Global	100	16	00:28:11.220000	160008	28.187	0.160008
Prokka	PROKKA	NG - Global	500	16	03:46:41	466452	226.683	0.466452
Prokka	PROKKA	NG - Global	1000	16	04:35:52	277152	275.867	0.277152
Prokka	PROKKA	NG - Global	3000	16	18:19:42	492256	1099.7	0.492256
Panaroo	PAN - M	NG - Global	5	16	00:00:28.650000	316192	0.4775	0.316192
Panaroo	PAN - M	NG - Global	10	16	00:00:36.190000	317148	0.603167	0.317148
Panaroo	PAN - M	NG - Global	50	16	00:02:22.640000	397680	2.37733	0.39768
Panaroo	PAN - M	NG - Global	100	16	00:03:46.570000	510224	3.77617	0.510224
Panaroo	PAN - M	NG - Global	500	16	00:23:31.700000	1789348	23.5283	1.78935
Panaroo	PAN - M	NG - Global	1000	16	01:41:16	3717280	101.267	3.71728
Panaroo	PAN - M	NG - Global	3000	16	10:44:03	12770208	644.05	12.7702
ggCaller	GGC - ST	NG - Global	5	16	00:01:53.010000	827168	1.8835	0.827168
ggCaller	GGC - ST	NG - Global	10	16	00:02:15.950000	1164780	2.26583	1.16478
ggCaller	GGC - ST	NG - Global	50	16	00:05:51.540000	2524820	5.859	2.52482
ggCaller	GGC - ST	NG - Global	100	16	00:09:42.330000	3754608	9.7055	3.75461
ggCaller	GGC - ST	NG - Global	500	16	01:04:36	18077828	64.6	18.0778
ggCaller	GGC - ST	NG - Global	1000	16	03:26:07	38969980	206.117	38.97
ggCaller	GGC - ST	NG - Global	3000	16	21:20:48	152298472	1280.8	152.298
PEPPAN	PEP	NG - Global	5	16	00:00:46.210000	350184	0.770167	0.350184
PEPPAN	PEP	NG - Global	10	16	00:00:55.450000	397332	0.924167	0.397332
PEPPAN	PEP	NG - Global	50	16	00:04:45.690000	842704	4.7615	0.842704
PEPPAN	PEP	NG - Global	100	16	00:09:59.960000	1483420	9.99933	1.48342
PEPPAN	PEP	NG - Global	500	16	01:26:03	6960476	86.05	6.96048
PEPPAN	PEP	NG - Global	1000	16	05:28:19	13291584	328.317	13.2916
PEPPAN	PEP	NG - Global	3000	16	1900-01-02 00:45:07	61819444	2925.12	61.8194
Roary	ROA	NG - Global	5	16	00:00:19.140000	425348	0.319	0.425348
Roary	ROA	NG - Global	10	16	00:00:31.360000	437916	0.522667	0.437916
Roary	ROA	NG - Global	50	16	00:02:51.050000	531148	2.85083	0.531148
Roary	ROA	NG - Global	100	16	00:04:54.250000	917664	4.90417	0.917664
Roary	ROA	NG - Global	500	16	00:31:27.340000	4513980	31.4557	4.51398
Roary	ROA	NG - Global	1000	16	01:08:59	9920464	68.9833	9.92046
Roary	ROA	NG - Global	3000	16	06:13:08	37220904	373.133	37.2209

## Sheet: Pangenome_size
Tool	Tool_short	Dataset	Num_Isolates	No. Core COGs	No. Total COGs	No. Accessory COGs
ggCaller	GGC - ST	SP - Global	5	1724	2427	703
ggCaller	GGC - ST	SP - Global	10	1625	3005	1380
ggCaller	GGC - ST	SP - Global	50	1508	3992	2484
ggCaller	GGC - ST	SP - Global	100	1526	4637	3111
ggCaller	GGC - ST	SP - Global	500	1472	6037	4565
ggCaller	GGC - ST	SP - Global	1000	1466	6766	5300
ggCaller	GGC - ST	SP - Global	2000	1462	7833	6371
ggCaller	GGC - ST	SP - Massachusetts	5	1720	2379	659
ggCaller	GGC - ST	SP - Massachusetts	10	1577	2859	1282
ggCaller	GGC - ST	SP - Massachusetts	50	1510	3610	2100
ggCaller	GGC - ST	SP - Massachusetts	100	1499	3836	2337
ggCaller	GGC - ST	SP - Massachusetts	500	1518	4358	2840
ggCaller	GGC - ST	NG - Global	5	1898	2258	360
ggCaller	GGC - ST	NG - Global	10	1876	2276	400
ggCaller	GGC - ST	NG - Global	50	492	2550	2058
ggCaller	GGC - ST	NG - Global	100	1770	2556	786
ggCaller	GGC - ST	NG - Global	500	1797	3874	2077
ggCaller	GGC - ST	NG - Global	1000	1816	6319	4503
ggCaller	GGC - ST	NG - Global	3000	1885	11757	9872
Panaroo	PAN - ST	SP - Global	5	1688	2409	721
Panaroo	PAN - ST	SP - Global	10	1594	2946	1352
Panaroo	PAN - ST	SP - Global	50	1496	4014	2518
Panaroo	PAN - ST	SP - Global	100	1494	4649	3155
Panaroo	PAN - ST	SP - Global	500	1433	5952	4519
Panaroo	PAN - ST	SP - Global	1000	1399	6585	5186
Panaroo	PAN - ST	SP - Global	2000	1361	7620	6259
Panaroo	PAN - ST	SP - Massachusetts	5	1685	2340	655
Panaroo	PAN - ST	SP - Massachusetts	10	1554	2797	1243
Panaroo	PAN - ST	SP - Massachusetts	50	1515	3186	1671
Panaroo	PAN - ST	SP - Massachusetts	100	1497	3476	1979
Panaroo	PAN - ST	SP - Massachusetts	500	1497	3872	2375
Panaroo	PAN - ST	NG - Global	5	1878	2256	378
Panaroo	PAN - ST	NG - Global	10	1857	2255	398
Panaroo	PAN - ST	NG - Global	50	289	2391	2102
Panaroo	PAN - ST	NG - Global	100	1728	2445	717
Panaroo	PAN - ST	NG - Global	500	1703	2566	863
Panaroo	PAN - ST	NG - Global	1000	1667	3877	2210
Panaroo	PAN - ST	NG - Global	3000	1642	7991	6349
PEPPAN	PEP	SP - Global	5	1703	2547	844
PEPPAN	PEP	SP - Global	10	1611	3235	1624
PEPPAN	PEP	SP - Global	50	1519	4444	2925
PEPPAN	PEP	SP - Global	100	1431	5113	3682
PEPPAN	PEP	SP - Global	500	1260	7212	5952
PEPPAN	PEP	SP - Global	1000	1171	8767	7596
PEPPAN	PEP	SP - Global	2000	NA	NA	#VALUE!
PEPPAN	PEP	SP - Massachusetts	5	1721	2442	721
PEPPAN	PEP	SP - Massachusetts	10	1598	2996	1398
PEPPAN	PEP	SP - Massachusetts	50	1542	3611	2069
PEPPAN	PEP	SP - Massachusetts	100	1483	3814	2331
PEPPAN	PEP	SP - Massachusetts	500	1422	4452	3030
PEPPAN	PEP	NG - Global	5	1910	2271	361
PEPPAN	PEP	NG - Global	10	1883	2314	431
PEPPAN	PEP	NG - Global	50	1618	5191	3573
PEPPAN	PEP	NG - Global	100	1603	5310	3707
PEPPAN	PEP	NG - Global	500	1549	13344	11795
PEPPAN	PEP	NG - Global	1000	1521	23587	22066
PEPPAN	PEP	NG - Global	3000	192	47872	47680
Roary	ROA	SP - Global	5	1543	2881	1338
Roary	ROA	SP - Global	10	1438	3760	2322
Roary	ROA	SP - Global	50	1250	6040	4790
Roary	ROA	SP - Global	100	1222	7360	6138
Roary	ROA	SP - Global	500	965	12189	11224
Roary	ROA	SP - Global	1000	848	15187	14339
Roary	ROA	SP - Global	2000	697	19354	18657
Roary	ROA	SP - Massachusetts	5	1553	2773	1220
Roary	ROA	SP - Massachusetts	10	1381	3655	2274
Roary	ROA	SP - Massachusetts	50	1302	4719	3417
Roary	ROA	SP - Massachusetts	100	1256	5333	4077
Roary	ROA	SP - Massachusetts	500	1164	7133	5969
Roary	ROA	NG - Global	5	1785	2516	731
Roary	ROA	NG - Global	10	1751	2642	891
Roary	ROA	NG - Global	50	689	8288	7599
Roary	ROA	NG - Global	100	1385	8781	7396
Roary	ROA	NG - Global	500	1451	18644	17193
Roary	ROA	NG - Global	1000	1393	30952	29559
Roary	ROA	NG - Global	3000	1240	63615	62375
