# Supplementary material for: Accurate and fast graph-based pangenome annotation and clustering with ggCaller
Source: HighWire-hosted journal article supplement (doi:10.1101/gr.277733.123), 2023-08-24
Supplement: Supplemental_Code.zip [file group3_fragmentation_comparison.xlsx]

## Sheet: Stacked_data
Tool	Tool_short	Assembly_type	Exact	Type	Stat
Prokka + Panaroo	PR-PAN	Original	TRUE	Total_ORFs	103
Prokka + Panaroo	PR-PAN	Fragmented	TRUE	Total_ORFs	85
GeneMarkS-2 + Panaroo	GE-PAN	Original	TRUE	Total_ORFs	102
GeneMarkS-2 + Panaroo	GE-PAN	Fragmented	TRUE	Total_ORFs	162
ggCaller	GGC	Original	TRUE	Total_ORFs	109
ggCaller	GGC	Fragmented	TRUE	Total_ORFs	104
Prokka + Panaroo	PR-PAN	Original	FALSE	Total_ORFs	103
Prokka + Panaroo	PR-PAN	Fragmented	FALSE	Total_ORFs	85
GeneMarkS-2 + Panaroo	GE-PAN	Original	FALSE	Total_ORFs	102
GeneMarkS-2 + Panaroo	GE-PAN	Fragmented	FALSE	Total_ORFs	162
ggCaller	GGC	Original	FALSE	Total_ORFs	109
ggCaller	GGC	Fragmented	FALSE	Total_ORFs	104
Prokka + Panaroo	PR-PAN	Original	TRUE	Total_callable_genes	84
Prokka + Panaroo	PR-PAN	Fragmented	TRUE	Total_callable_genes	84
GeneMarkS-2 + Panaroo	GE-PAN	Original	TRUE	Total_callable_genes	84
GeneMarkS-2 + Panaroo	GE-PAN	Fragmented	TRUE	Total_callable_genes	84
ggCaller	GGC	Original	TRUE	Total_callable_genes	84
ggCaller	GGC	Fragmented	TRUE	Total_callable_genes	84
Prokka + Panaroo	PR-PAN	Original	FALSE	Total_callable_genes	84
Prokka + Panaroo	PR-PAN	Fragmented	FALSE	Total_callable_genes	84
GeneMarkS-2 + Panaroo	GE-PAN	Original	FALSE	Total_callable_genes	84
GeneMarkS-2 + Panaroo	GE-PAN	Fragmented	FALSE	Total_callable_genes	84
ggCaller	GGC	Original	FALSE	Total_callable_genes	84
ggCaller	GGC	Fragmented	FALSE	Total_callable_genes	84
Prokka + Panaroo	PR-PAN	Original	TRUE	TP	78
Prokka + Panaroo	PR-PAN	Fragmented	TRUE	TP	0
GeneMarkS-2 + Panaroo	GE-PAN	Original	TRUE	TP	75
GeneMarkS-2 + Panaroo	GE-PAN	Fragmented	TRUE	TP	0
ggCaller	GGC	Original	TRUE	TP	74
ggCaller	GGC	Fragmented	TRUE	TP	18
Prokka + Panaroo	PR-PAN	Original	FALSE	TP	84
Prokka + Panaroo	PR-PAN	Fragmented	FALSE	TP	61
GeneMarkS-2 + Panaroo	GE-PAN	Original	FALSE	TP	84
GeneMarkS-2 + Panaroo	GE-PAN	Fragmented	FALSE	TP	76
ggCaller	GGC	Original	FALSE	TP	84
ggCaller	GGC	Fragmented	FALSE	TP	70
Prokka + Panaroo	PR-PAN	Original	TRUE	FP	25
Prokka + Panaroo	PR-PAN	Fragmented	TRUE	FP	85
GeneMarkS-2 + Panaroo	GE-PAN	Original	TRUE	FP	27
GeneMarkS-2 + Panaroo	GE-PAN	Fragmented	TRUE	FP	161
ggCaller	GGC	Original	TRUE	FP	35
ggCaller	GGC	Fragmented	TRUE	FP	79
Prokka + Panaroo	PR-PAN	Original	FALSE	FP	19
Prokka + Panaroo	PR-PAN	Fragmented	FALSE	FP	24
GeneMarkS-2 + Panaroo	GE-PAN	Original	FALSE	FP	18
GeneMarkS-2 + Panaroo	GE-PAN	Fragmented	FALSE	FP	85
ggCaller	GGC	Original	FALSE	FP	25
ggCaller	GGC	Fragmented	FALSE	FP	27
Prokka + Panaroo	PR-PAN	Original	TRUE	FN	6
Prokka + Panaroo	PR-PAN	Fragmented	TRUE	FN	84
GeneMarkS-2 + Panaroo	GE-PAN	Original	TRUE	FN	9
GeneMarkS-2 + Panaroo	GE-PAN	Fragmented	TRUE	FN	84
ggCaller	GGC	Original	TRUE	FN	10
ggCaller	GGC	Fragmented	TRUE	FN	66
Prokka + Panaroo	PR-PAN	Original	FALSE	FN	0
Prokka + Panaroo	PR-PAN	Fragmented	FALSE	FN	23
GeneMarkS-2 + Panaroo	GE-PAN	Original	FALSE	FN	0
GeneMarkS-2 + Panaroo	GE-PAN	Fragmented	FALSE	FN	8
ggCaller	GGC	Original	FALSE	FN	0
ggCaller	GGC	Fragmented	FALSE	FN	14
Prokka + Panaroo	PR-PAN	Original	TRUE	Artificial_calls	0
Prokka + Panaroo	PR-PAN	Fragmented	TRUE	Artificial_calls	0
GeneMarkS-2 + Panaroo	GE-PAN	Original	TRUE	Artificial_calls	0
GeneMarkS-2 + Panaroo	GE-PAN	Fragmented	TRUE	Artificial_calls	0
ggCaller	GGC	Original	TRUE	Artificial_calls	0
ggCaller	GGC	Fragmented	TRUE	Artificial_calls	0
Prokka + Panaroo	PR-PAN	Original	FALSE	Artificial_calls	0
Prokka + Panaroo	PR-PAN	Fragmented	FALSE	Artificial_calls	0
GeneMarkS-2 + Panaroo	GE-PAN	Original	FALSE	Artificial_calls	0
GeneMarkS-2 + Panaroo	GE-PAN	Fragmented	FALSE	Artificial_calls	0
ggCaller	GGC	Original	FALSE	Artificial_calls	0
ggCaller	GGC	Fragmented	FALSE	Artificial_calls	0
Prokka + Panaroo	PR-PAN	Original	TRUE	Duplicated_calls	0
Prokka + Panaroo	PR-PAN	Fragmented	TRUE	Duplicated_calls	0
GeneMarkS-2 + Panaroo	GE-PAN	Original	TRUE	Duplicated_calls	0
GeneMarkS-2 + Panaroo	GE-PAN	Fragmented	TRUE	Duplicated_calls	1
ggCaller	GGC	Original	TRUE	Duplicated_calls	0
ggCaller	GGC	Fragmented	TRUE	Duplicated_calls	7
Prokka + Panaroo	PR-PAN	Original	FALSE	Duplicated_calls	0
Prokka + Panaroo	PR-PAN	Fragmented	FALSE	Duplicated_calls	0
GeneMarkS-2 + Panaroo	GE-PAN	Original	FALSE	Duplicated_calls	0
GeneMarkS-2 + Panaroo	GE-PAN	Fragmented	FALSE	Duplicated_calls	1
ggCaller	GGC	Original	FALSE	Duplicated_calls	0
ggCaller	GGC	Fragmented	FALSE	Duplicated_calls	7
Prokka + Panaroo	PR-PAN	Original	TRUE	Recall	0.928571
Prokka + Panaroo	PR-PAN	Fragmented	TRUE	Recall	0
GeneMarkS-2 + Panaroo	GE-PAN	Original	TRUE	Recall	0.892857
GeneMarkS-2 + Panaroo	GE-PAN	Fragmented	TRUE	Recall	0
ggCaller	GGC	Original	TRUE	Recall	0.880952
ggCaller	GGC	Fragmented	TRUE	Recall	0.214286
Prokka + Panaroo	PR-PAN	Original	FALSE	Recall	1
Prokka + Panaroo	PR-PAN	Fragmented	FALSE	Recall	0.72619
GeneMarkS-2 + Panaroo	GE-PAN	Original	FALSE	Recall	1
GeneMarkS-2 + Panaroo	GE-PAN	Fragmented	FALSE	Recall	0.904762
ggCaller	GGC	Original	FALSE	Recall	1
ggCaller	GGC	Fragmented	FALSE	Recall	0.833333
Prokka + Panaroo	PR-PAN	Original	TRUE	Precision	0.757282
Prokka + Panaroo	PR-PAN	Fragmented	TRUE	Precision	0
GeneMarkS-2 + Panaroo	GE-PAN	Original	TRUE	Precision	0.735294
GeneMarkS-2 + Panaroo	GE-PAN	Fragmented	TRUE	Precision	0
ggCaller	GGC	Original	TRUE	Precision	0.678899
ggCaller	GGC	Fragmented	TRUE	Precision	0.173077
Prokka + Panaroo	PR-PAN	Original	FALSE	Precision	0.815534
Prokka + Panaroo	PR-PAN	Fragmented	FALSE	Precision	0.717647
GeneMarkS-2 + Panaroo	GE-PAN	Original	FALSE	Precision	0.823529
GeneMarkS-2 + Panaroo	GE-PAN	Fragmented	FALSE	Precision	0.469136
ggCaller	GGC	Original	FALSE	Precision	0.770642
ggCaller	GGC	Fragmented	FALSE	Precision	0.673077
Prokka + Panaroo	PR-PAN	Original	TRUE	Mean_prop_gene_length	0.998812
Prokka + Panaroo	PR-PAN	Fragmented	TRUE	Mean_prop_gene_length	0.57458
GeneMarkS-2 + Panaroo	GE-PAN	Original	TRUE	Mean_prop_gene_length	0.995891
GeneMarkS-2 + Panaroo	GE-PAN	Fragmented	TRUE	Mean_prop_gene_length	0.552692
ggCaller	GGC	Original	TRUE	Mean_prop_gene_length	0.9978
ggCaller	GGC	Fragmented	TRUE	Mean_prop_gene_length	0.679248
Prokka + Panaroo	PR-PAN	Original	FALSE	Mean_prop_gene_length	0.998812
Prokka + Panaroo	PR-PAN	Fragmented	FALSE	Mean_prop_gene_length	0.57458
GeneMarkS-2 + Panaroo	GE-PAN	Original	FALSE	Mean_prop_gene_length	0.995891
GeneMarkS-2 + Panaroo	GE-PAN	Fragmented	FALSE	Mean_prop_gene_length	0.552692
ggCaller	GGC	Original	FALSE	Mean_prop_gene_length	0.9978
ggCaller	GGC	Fragmented	FALSE	Mean_prop_gene_length	0.679248
Prokka + Panaroo	PR-PAN	Original	TRUE	Stddev_prop_gene_length	0.00538226
Prokka + Panaroo	PR-PAN	Fragmented	TRUE	Stddev_prop_gene_length	0.256612
GeneMarkS-2 + Panaroo	GE-PAN	Original	TRUE	Stddev_prop_gene_length	0.0192079
GeneMarkS-2 + Panaroo	GE-PAN	Fragmented	TRUE	Stddev_prop_gene_length	0.289266
ggCaller	GGC	Original	TRUE	Stddev_prop_gene_length	0.0108982
ggCaller	GGC	Fragmented	TRUE	Stddev_prop_gene_length	0.28455
Prokka + Panaroo	PR-PAN	Original	FALSE	Stddev_prop_gene_length	0.00538226
Prokka + Panaroo	PR-PAN	Fragmented	FALSE	Stddev_prop_gene_length	0.256612
GeneMarkS-2 + Panaroo	GE-PAN	Original	FALSE	Stddev_prop_gene_length	0.0192079
GeneMarkS-2 + Panaroo	GE-PAN	Fragmented	FALSE	Stddev_prop_gene_length	0.289266
ggCaller	GGC	Original	FALSE	Stddev_prop_gene_length	0.0108982
ggCaller	GGC	Fragmented	FALSE	Stddev_prop_gene_length	0.28455

## Sheet: ROC
Tool	Tool_short	Assembly_type	Exact	Recall	Precision
Prokka + Panaroo	PR-PAN	Original	TRUE	0.928571	0.757282
Prokka + Panaroo	PR-PAN	Fragmented	TRUE	0	0
GeneMarkS-2 + Panaroo	GE-PAN	Original	TRUE	0.892857	0.735294
GeneMarkS-2 + Panaroo	GE-PAN	Fragmented	TRUE	0	0
ggCaller	GGC	Original	TRUE	0.880952	0.678899
ggCaller	GGC	Fragmented	TRUE	0.214286	0.173077
Prokka + Panaroo	PR-PAN	Original	FALSE	1	0.815534
Prokka + Panaroo	PR-PAN	Fragmented	FALSE	0.72619	0.717647
GeneMarkS-2 + Panaroo	GE-PAN	Original	FALSE	1	0.823529
GeneMarkS-2 + Panaroo	GE-PAN	Fragmented	FALSE	0.904762	0.469136
ggCaller	GGC	Original	FALSE	1	0.770642
ggCaller	GGC	Fragmented	FALSE	0.833333	0.673077

## Sheet: Length_Proportions
Tool	Assembly_type	Length_prop
GeneMarkS-2 + Panaroo	Fragmented	0.620332
GeneMarkS-2 + Panaroo	Fragmented	0.663934
GeneMarkS-2 + Panaroo	Fragmented	0.584416
GeneMarkS-2 + Panaroo	Fragmented	0.342105
GeneMarkS-2 + Panaroo	Fragmented	0.118421
GeneMarkS-2 + Panaroo	Fragmented	0.404762
GeneMarkS-2 + Panaroo	Fragmented	0.964194
GeneMarkS-2 + Panaroo	Fragmented	0.852941
GeneMarkS-2 + Panaroo	Fragmented	0.100313
GeneMarkS-2 + Panaroo	Fragmented	0.816254
GeneMarkS-2 + Panaroo	Fragmented	0.72541
GeneMarkS-2 + Panaroo	Fragmented	0.455556
GeneMarkS-2 + Panaroo	Fragmented	0.157353
GeneMarkS-2 + Panaroo	Fragmented	0.178423
GeneMarkS-2 + Panaroo	Fragmented	0.704918
GeneMarkS-2 + Panaroo	Fragmented	0.601732
GeneMarkS-2 + Panaroo	Fragmented	0.86087
GeneMarkS-2 + Panaroo	Fragmented	0.385965
GeneMarkS-2 + Panaroo	Fragmented	0.866667
GeneMarkS-2 + Panaroo	Fragmented	0.47929
GeneMarkS-2 + Panaroo	Fragmented	0.185
GeneMarkS-2 + Panaroo	Fragmented	0.676385
GeneMarkS-2 + Panaroo	Fragmented	0.76489
GeneMarkS-2 + Panaroo	Fragmented	0.227723
GeneMarkS-2 + Panaroo	Fragmented	0.438525
GeneMarkS-2 + Panaroo	Fragmented	0.375979
GeneMarkS-2 + Panaroo	Fragmented	0.912536
GeneMarkS-2 + Panaroo	Fragmented	0.13617
GeneMarkS-2 + Panaroo	Fragmented	0.176259
GeneMarkS-2 + Panaroo	Fragmented	0.541494
GeneMarkS-2 + Panaroo	Fragmented	0.959016
GeneMarkS-2 + Panaroo	Fragmented	0.883117
GeneMarkS-2 + Panaroo	Fragmented	0.197368
GeneMarkS-2 + Panaroo	Fragmented	0.217105
GeneMarkS-2 + Panaroo	Fragmented	0.988095
GeneMarkS-2 + Panaroo	Fragmented	0.941176
GeneMarkS-2 + Panaroo	Fragmented	0.266458
GeneMarkS-2 + Panaroo	Fragmented	0.409241
GeneMarkS-2 + Panaroo	Fragmented	0.209016
GeneMarkS-2 + Panaroo	Fragmented	0.788344
GeneMarkS-2 + Panaroo	Fragmented	0.240209
GeneMarkS-2 + Panaroo	Fragmented	0.413994
GeneMarkS-2 + Panaroo	Fragmented	0.451064
GeneMarkS-2 + Panaroo	Fragmented	0.690647
GeneMarkS-2 + Panaroo	Fragmented	0.925311
GeneMarkS-2 + Panaroo	Fragmented	0.340164
GeneMarkS-2 + Panaroo	Fragmented	0.5671
GeneMarkS-2 + Panaroo	Fragmented	0.969298
GeneMarkS-2 + Panaroo	Fragmented	0.390351
GeneMarkS-2 + Panaroo	Fragmented	0.946667
GeneMarkS-2 + Panaroo	Fragmented	0.583333
GeneMarkS-2 + Panaroo	Fragmented	0.140665
GeneMarkS-2 + Panaroo	Fragmented	0.780564
GeneMarkS-2 + Panaroo	Fragmented	0.976898
GeneMarkS-2 + Panaroo	Fragmented	0.977459
GeneMarkS-2 + Panaroo	Fragmented	0.741514
GeneMarkS-2 + Panaroo	Fragmented	0.885106
GeneMarkS-2 + Panaroo	Fragmented	0.602113
GeneMarkS-2 + Panaroo	Fragmented	0.507216
GeneMarkS-2 + Panaroo	Fragmented	0.979508
GeneMarkS-2 + Panaroo	Fragmented	0.268398
GeneMarkS-2 + Panaroo	Fragmented	0.656522
GeneMarkS-2 + Panaroo	Fragmented	0.221491
GeneMarkS-2 + Panaroo	Fragmented	0.913333
GeneMarkS-2 + Panaroo	Fragmented	0.343195
GeneMarkS-2 + Panaroo	Fragmented	0.386139
GeneMarkS-2 + Panaroo	Fragmented	0.323615
GeneMarkS-2 + Panaroo	Fragmented	0.780564
GeneMarkS-2 + Panaroo	Fragmented	0.145215
GeneMarkS-2 + Panaroo	Fragmented	0.307377
GeneMarkS-2 + Panaroo	Fragmented	0.92638
GeneMarkS-2 + Panaroo	Fragmented	0.884892
GeneMarkS-2 + Panaroo	Fragmented	0.211268
GeneMarkS-2 + Panaroo	Fragmented	0.809859
GeneMarkS-2 + Panaroo	Fragmented	0.140541
GeneMarkS-2 + Panaroo	Fragmented	0.398876
GeneMarkS-2 + Panaroo	Original	1
GeneMarkS-2 + Panaroo	Original	1
GeneMarkS-2 + Panaroo	Original	1
GeneMarkS-2 + Panaroo	Original	1
GeneMarkS-2 + Panaroo	Original	1
GeneMarkS-2 + Panaroo	Original	1
GeneMarkS-2 + Panaroo	Original	1
GeneMarkS-2 + Panaroo	Original	1
GeneMarkS-2 + Panaroo	Original	1
GeneMarkS-2 + Panaroo	Original	1.04702
GeneMarkS-2 + Panaroo	Original	1
GeneMarkS-2 + Panaroo	Original	1
GeneMarkS-2 + Panaroo	Original	1
GeneMarkS-2 + Panaroo	Original	0.998529
GeneMarkS-2 + Panaroo	Original	1
GeneMarkS-2 + Panaroo	Original	1
GeneMarkS-2 + Panaroo	Original	1
GeneMarkS-2 + Panaroo	Original	1
GeneMarkS-2 + Panaroo	Original	1
GeneMarkS-2 + Panaroo	Original	1
GeneMarkS-2 + Panaroo	Original	1
GeneMarkS-2 + Panaroo	Original	0.905
GeneMarkS-2 + Panaroo	Original	1
GeneMarkS-2 + Panaroo	Original	1
GeneMarkS-2 + Panaroo	Original	1
GeneMarkS-2 + Panaroo	Original	1
GeneMarkS-2 + Panaroo	Original	1
GeneMarkS-2 + Panaroo	Original	1
GeneMarkS-2 + Panaroo	Original	1
GeneMarkS-2 + Panaroo	Original	1
GeneMarkS-2 + Panaroo	Original	1
GeneMarkS-2 + Panaroo	Original	1
GeneMarkS-2 + Panaroo	Original	1
GeneMarkS-2 + Panaroo	Original	1
GeneMarkS-2 + Panaroo	Original	1
GeneMarkS-2 + Panaroo	Original	1
GeneMarkS-2 + Panaroo	Original	1
GeneMarkS-2 + Panaroo	Original	0.936061
GeneMarkS-2 + Panaroo	Original	1
GeneMarkS-2 + Panaroo	Original	1
GeneMarkS-2 + Panaroo	Original	1
GeneMarkS-2 + Panaroo	Original	1
GeneMarkS-2 + Panaroo	Original	1
GeneMarkS-2 + Panaroo	Original	1
GeneMarkS-2 + Panaroo	Original	1
GeneMarkS-2 + Panaroo	Original	1
GeneMarkS-2 + Panaroo	Original	1
GeneMarkS-2 + Panaroo	Original	1
GeneMarkS-2 + Panaroo	Original	1
GeneMarkS-2 + Panaroo	Original	1
GeneMarkS-2 + Panaroo	Original	1
GeneMarkS-2 + Panaroo	Original	1
GeneMarkS-2 + Panaroo	Original	1
GeneMarkS-2 + Panaroo	Original	1
GeneMarkS-2 + Panaroo	Original	0.936061
GeneMarkS-2 + Panaroo	Original	1
GeneMarkS-2 + Panaroo	Original	1
GeneMarkS-2 + Panaroo	Original	1
GeneMarkS-2 + Panaroo	Original	1
GeneMarkS-2 + Panaroo	Original	1
GeneMarkS-2 + Panaroo	Original	1
GeneMarkS-2 + Panaroo	Original	1
GeneMarkS-2 + Panaroo	Original	0.978873
GeneMarkS-2 + Panaroo	Original	0.993814
GeneMarkS-2 + Panaroo	Original	1
GeneMarkS-2 + Panaroo	Original	1
GeneMarkS-2 + Panaroo	Original	1
GeneMarkS-2 + Panaroo	Original	1
GeneMarkS-2 + Panaroo	Original	1
GeneMarkS-2 + Panaroo	Original	1
GeneMarkS-2 + Panaroo	Original	0.89604
GeneMarkS-2 + Panaroo	Original	1
GeneMarkS-2 + Panaroo	Original	1
GeneMarkS-2 + Panaroo	Original	1
GeneMarkS-2 + Panaroo	Original	1
GeneMarkS-2 + Panaroo	Original	1
GeneMarkS-2 + Panaroo	Original	1
GeneMarkS-2 + Panaroo	Original	1
GeneMarkS-2 + Panaroo	Original	1
GeneMarkS-2 + Panaroo	Original	1
GeneMarkS-2 + Panaroo	Original	1
GeneMarkS-2 + Panaroo	Original	1
GeneMarkS-2 + Panaroo	Original	1
GeneMarkS-2 + Panaroo	Original	0.963483
ggCaller	Fragmented	0.936061
ggCaller	Fragmented	0.684426
ggCaller	Fragmented	0.808824
ggCaller	Fragmented	0.458506
ggCaller	Fragmented	0.75265
ggCaller	Fragmented	0.155147
ggCaller	Fragmented	0.388889
ggCaller	Fragmented	0.575758
ggCaller	Fragmented	0.483607
ggCaller	Fragmented	0.179825
ggCaller	Fragmented	1
ggCaller	Fragmented	1
ggCaller	Fragmented	1
ggCaller	Fragmented	0.705539
ggCaller	Fragmented	0.749216
ggCaller	Fragmented	1
ggCaller	Fragmented	0.403689
ggCaller	Fragmented	0.704918
ggCaller	Fragmented	1
ggCaller	Fragmented	0.394256
ggCaller	Fragmented	0.575758
ggCaller	Fragmented	0.182573
ggCaller	Fragmented	0.2125
ggCaller	Fragmented	0.48
ggCaller	Fragmented	1
ggCaller	Fragmented	1
ggCaller	Fragmented	0.699387
ggCaller	Fragmented	0.458506
ggCaller	Fragmented	0.897541
ggCaller	Fragmented	0.883117
ggCaller	Fragmented	1
ggCaller	Fragmented	0.597122
ggCaller	Fragmented	0.460641
ggCaller	Fragmented	0.394256
ggCaller	Fragmented	0.31348
ggCaller	Fragmented	0.417021
ggCaller	Fragmented	0.179825
ggCaller	Fragmented	0.157787
ggCaller	Fragmented	0.97541
ggCaller	Fragmented	0.93361
ggCaller	Fragmented	0.756181
ggCaller	Fragmented	1
ggCaller	Fragmented	0.801567
ggCaller	Fragmented	1
ggCaller	Fragmented	0.749216
ggCaller	Fragmented	1
ggCaller	Fragmented	0.855319
ggCaller	Fragmented	0.372807
ggCaller	Fragmented	0.584507
ggCaller	Fragmented	0.9
ggCaller	Fragmented	0.575758
ggCaller	Fragmented	0.642857
ggCaller	Fragmented	0.266393
ggCaller	Fragmented	1
ggCaller	Fragmented	0.960836
ggCaller	Fragmented	1
ggCaller	Fragmented	1
ggCaller	Fragmented	0.906475
ggCaller	Fragmented	0.749216
ggCaller	Fragmented	1
ggCaller	Fragmented	1
ggCaller	Fragmented	1
ggCaller	Fragmented	0.45567
ggCaller	Fragmented	0.897541
ggCaller	Fragmented	0.403689
ggCaller	Fragmented	1
ggCaller	Fragmented	0.358911
ggCaller	Fragmented	0.36236
ggCaller	Fragmented	0.268222
ggCaller	Fragmented	0.48
ggCaller	Original	0.998529
ggCaller	Original	1
ggCaller	Original	1
ggCaller	Original	1
ggCaller	Original	1
ggCaller	Original	1
ggCaller	Original	1
ggCaller	Original	1
ggCaller	Original	1
ggCaller	Original	1
ggCaller	Original	1
ggCaller	Original	1.04702
ggCaller	Original	1
ggCaller	Original	1
ggCaller	Original	1
ggCaller	Original	0.960836
ggCaller	Original	1
ggCaller	Original	1
ggCaller	Original	1
ggCaller	Original	1
ggCaller	Original	1
ggCaller	Original	1
ggCaller	Original	1
ggCaller	Original	1
ggCaller	Original	1
ggCaller	Original	1
ggCaller	Original	1
ggCaller	Original	1
ggCaller	Original	1
ggCaller	Original	1
ggCaller	Original	0.960836
ggCaller	Original	1
ggCaller	Original	1
ggCaller	Original	1
ggCaller	Original	1
ggCaller	Original	1
ggCaller	Original	1
ggCaller	Original	1
ggCaller	Original	1
ggCaller	Original	1
ggCaller	Original	1
ggCaller	Original	1
ggCaller	Original	1
ggCaller	Original	1
ggCaller	Original	1
ggCaller	Original	1
ggCaller	Original	1
ggCaller	Original	0.960836
ggCaller	Original	1
ggCaller	Original	0.978873
ggCaller	Original	1
ggCaller	Original	1
ggCaller	Original	1
ggCaller	Original	1
ggCaller	Original	1
ggCaller	Original	1
ggCaller	Original	1
ggCaller	Original	1
ggCaller	Original	1
ggCaller	Original	1
ggCaller	Original	1
ggCaller	Original	1
ggCaller	Original	1
ggCaller	Original	0.990099
ggCaller	Original	1
ggCaller	Original	0.960836
ggCaller	Original	0.963483
ggCaller	Original	1
ggCaller	Original	1
ggCaller	Original	1
ggCaller	Original	1
ggCaller	Original	1
ggCaller	Original	1
ggCaller	Original	1
ggCaller	Original	1
ggCaller	Original	1
ggCaller	Original	1
ggCaller	Original	1
ggCaller	Original	1
ggCaller	Original	0.993814
ggCaller	Original	1
ggCaller	Original	1
ggCaller	Original	1
ggCaller	Original	1
Prokka + Panaroo	Fragmented	0.481328
Prokka + Panaroo	Fragmented	0.54918
Prokka + Panaroo	Fragmented	0.575758
Prokka + Panaroo	Fragmented	0.380952
Prokka + Panaroo	Fragmented	0.936061
Prokka + Panaroo	Fragmented	0.808824
Prokka + Panaroo	Fragmented	0.75265
Prokka + Panaroo	Fragmented	0.684426
Prokka + Panaroo	Fragmented	0.388889
Prokka + Panaroo	Fragmented	0.155147
Prokka + Panaroo	Fragmented	0.145228
Prokka + Panaroo	Fragmented	0.704918
Prokka + Panaroo	Fragmented	0.575758
Prokka + Panaroo	Fragmented	0.817391
Prokka + Panaroo	Fragmented	0.307018
Prokka + Panaroo	Fragmented	0.48
Prokka + Panaroo	Fragmented	0.414201
Prokka + Panaroo	Fragmented	0.48688
Prokka + Panaroo	Fragmented	0.749216
Prokka + Panaroo	Fragmented	0.401639
Prokka + Panaroo	Fragmented	0.281984
Prokka + Panaroo	Fragmented	0.886297
Prokka + Panaroo	Fragmented	0.165468
Prokka + Panaroo	Fragmented	0.481328
Prokka + Panaroo	Fragmented	0.897541
Prokka + Panaroo	Fragmented	0.883117
Prokka + Panaroo	Fragmented	0.184211
Prokka + Panaroo	Fragmented	0.982143
Prokka + Panaroo	Fragmented	0.936061
Prokka + Panaroo	Fragmented	0.699387
Prokka + Panaroo	Fragmented	0.224543
Prokka + Panaroo	Fragmented	0.413994
Prokka + Panaroo	Fragmented	0.417021
Prokka + Panaroo	Fragmented	0.597122
Prokka + Panaroo	Fragmented	0.89834
Prokka + Panaroo	Fragmented	0.266393
Prokka + Panaroo	Fragmented	0.536797
Prokka + Panaroo	Fragmented	0.899123
Prokka + Panaroo	Fragmented	0.372807
Prokka + Panaroo	Fragmented	0.9
Prokka + Panaroo	Fragmented	0.541667
Prokka + Panaroo	Fragmented	0.749216
Prokka + Panaroo	Fragmented	0.943894
Prokka + Panaroo	Fragmented	0.97541
Prokka + Panaroo	Fragmented	0.605744
Prokka + Panaroo	Fragmented	0.855319
Prokka + Panaroo	Fragmented	0.584507
Prokka + Panaroo	Fragmented	0.478351
Prokka + Panaroo	Fragmented	0.897541
Prokka + Panaroo	Fragmented	0.404348
Prokka + Panaroo	Fragmented	0.184211
Prokka + Panaroo	Fragmented	0.48
Prokka + Panaroo	Fragmented	0.358911
Prokka + Panaroo	Fragmented	0.268222
Prokka + Panaroo	Fragmented	0.749216
Prokka + Panaroo	Fragmented	0.290984
Prokka + Panaroo	Fragmented	0.849693
Prokka + Panaroo	Fragmented	0.870504
Prokka + Panaroo	Fragmented	0.725352
Prokka + Panaroo	Fragmented	0.135135
Prokka + Panaroo	Fragmented	0.382022
Prokka + Panaroo	Original	1
Prokka + Panaroo	Original	1
Prokka + Panaroo	Original	1
Prokka + Panaroo	Original	1
Prokka + Panaroo	Original	1
Prokka + Panaroo	Original	1
Prokka + Panaroo	Original	1
Prokka + Panaroo	Original	1
Prokka + Panaroo	Original	1
Prokka + Panaroo	Original	1
Prokka + Panaroo	Original	1
Prokka + Panaroo	Original	1
Prokka + Panaroo	Original	1
Prokka + Panaroo	Original	0.998529
Prokka + Panaroo	Original	1
Prokka + Panaroo	Original	1
Prokka + Panaroo	Original	1
Prokka + Panaroo	Original	1
Prokka + Panaroo	Original	1
Prokka + Panaroo	Original	1
Prokka + Panaroo	Original	1
Prokka + Panaroo	Original	1
Prokka + Panaroo	Original	1
Prokka + Panaroo	Original	1
Prokka + Panaroo	Original	1
Prokka + Panaroo	Original	1
Prokka + Panaroo	Original	1
Prokka + Panaroo	Original	1
Prokka + Panaroo	Original	1
Prokka + Panaroo	Original	1
Prokka + Panaroo	Original	1
Prokka + Panaroo	Original	1
Prokka + Panaroo	Original	1
Prokka + Panaroo	Original	1
Prokka + Panaroo	Original	1
Prokka + Panaroo	Original	1
Prokka + Panaroo	Original	1
Prokka + Panaroo	Original	1
Prokka + Panaroo	Original	1
Prokka + Panaroo	Original	1
Prokka + Panaroo	Original	1
Prokka + Panaroo	Original	1
Prokka + Panaroo	Original	1
Prokka + Panaroo	Original	1
Prokka + Panaroo	Original	1
Prokka + Panaroo	Original	1
Prokka + Panaroo	Original	1
Prokka + Panaroo	Original	1
Prokka + Panaroo	Original	1
Prokka + Panaroo	Original	1
Prokka + Panaroo	Original	1
Prokka + Panaroo	Original	1
Prokka + Panaroo	Original	1
Prokka + Panaroo	Original	1
Prokka + Panaroo	Original	1
Prokka + Panaroo	Original	1
Prokka + Panaroo	Original	1
Prokka + Panaroo	Original	1
Prokka + Panaroo	Original	1
Prokka + Panaroo	Original	1
Prokka + Panaroo	Original	1
Prokka + Panaroo	Original	1
Prokka + Panaroo	Original	0.978873
Prokka + Panaroo	Original	0.993814
Prokka + Panaroo	Original	1
Prokka + Panaroo	Original	1
Prokka + Panaroo	Original	1
Prokka + Panaroo	Original	1
Prokka + Panaroo	Original	1
Prokka + Panaroo	Original	1
Prokka + Panaroo	Original	0.990099
Prokka + Panaroo	Original	1
Prokka + Panaroo	Original	1
Prokka + Panaroo	Original	1
Prokka + Panaroo	Original	0.97541
Prokka + Panaroo	Original	1
Prokka + Panaroo	Original	1
Prokka + Panaroo	Original	1
Prokka + Panaroo	Original	1
Prokka + Panaroo	Original	1
Prokka + Panaroo	Original	1
Prokka + Panaroo	Original	1
Prokka + Panaroo	Original	1
Prokka + Panaroo	Original	0.963483
